# Supplementary material
Source: PubMed Central journal article supplement (PMC3021499)
Supplement: dne0032-0313-s01.pdf [file dne0032-0313-s01.pdf]

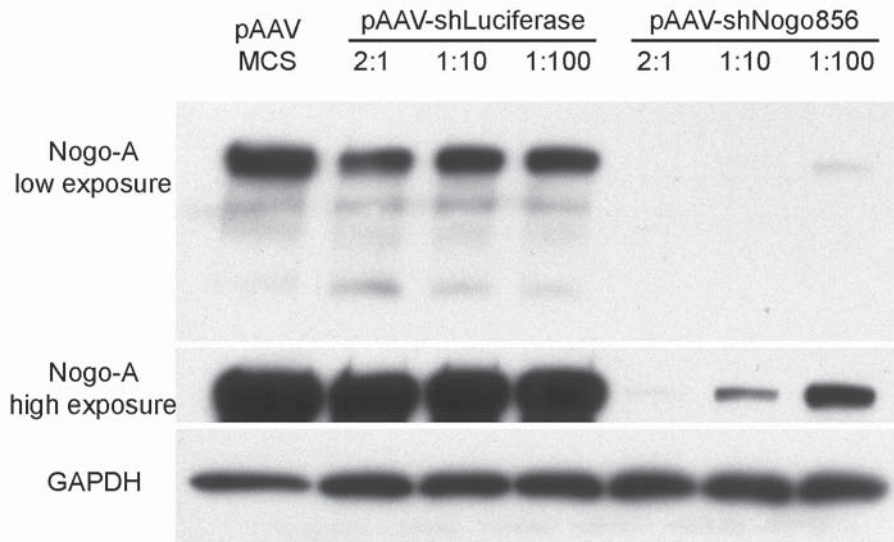

Supplemental figure 1. Dose-related effects of pAAV-shNogo856 on exogenous Nogo-A expression in HEK-293 cells, as exemplified by a representative western blot. Numbers indicate the molar ratios of shRNA:target.
